# Supplementary material for: Identification of Differentially Expressed Genes and Pathways Involved in Growth and Development of Mesona chinensis Benth Under Red- and Blue-Light Conditions
Source: Front Plant Sci. 2021 Nov 25;12:761068. doi: 10.3389/fpls.2021.761068 (PMC8656965; doi:10.3389/fpls.2021.761068)
Supplement: Supplementary file 12 [file Data_Sheet_12.XLSX]

## Sheet: Sheet1
Table S11 The metabolites were identified in red and blue light treatments
ID	name	Superpathway	Subpathway	class	sub_class	mz	rt	exact_mass	ppm	formula	type	identify.pvalue	library	KEGG	hmdb	pubchem	CAS
M150T282	D-Ribose	Carbohydrate	Pentose phosphate pathway	Organooxygen compounds	Alcohols and polyols	150.055	282.334	150.053	11.365	C5H10O5	[M]+	0.000123955	MetaDNA	C00121	HMDB0000283	5779	613-83-2/50-69-1
M172T104	2-Oxoarginine	Amino acid	D-Arginine and D-ornithine metabolism	Carboxylic acids and derivatives	Alpha-keto acids and derivatives	172.072	103.775	173.08	3.77846	C6H11N3O3	[M-H]-	0.00172738	MetaDNA	C03771	HMDB0004225	558	3715-10-04
M253T98	Galactosylglycerol	Lipid	GlyceroLipid	Glycerolipids	Alcohols and polyols	253.093	98.0554	254.1	0.561501	C9H18O8	[M-H]-	3.30605e-06	MetaDNA	C05401	HMDB0006790	16048618	16232-91-0
M343T145	Melibiitol	Carbohydrate	Galactose metabolism	Fatty Acyls	Alcohols and polyols	343.124	144.856	344.132	2.69517	C12H24O11	[M-H]-	5.75982e-06	MetaDNA	C05399	HMDB0006791	15559964	497-83-6
M338T836	Erucic acid	Lipid	Biosynthesis of unsaturated fatty acids	Fatty Acyls	Fatty acids and conjugates	338.342	836.093	338.318	2.56307	C22H42O2	[M]+	5.21356e-12	BioDeepDB	C08316	HMDB0002068	5281116	112-86-7
M134T88	L-Aspartic acid	Amino acid	Alanine, aspartate and glutamate metabolism	Carboxylic acids and derivatives	Amino acids, peptides, and analogues	134.044	87.5228	133.037	3.26218	C4H7NO4	[M+H]+	5.97269e-05	BioDeepDB	C00049	HMDB0000191	83887	1783-96-6
M325T93	Melibiose	Carbohydrate	Galactose metabolism	Organooxygen compounds	Carbohydrates and carbohydrate conjugates	325.113	92.7975	342.116	13.4666	C12H22O11	[M+H-H2O]+	8.66396e-06	BioDeepDB	C05400	HMDB0000048	46173743	585-99-9 / 17296-19-4
M106T87_1	L-Serine	Amino acid	Glycine, serine and threonine metabolism	Carboxylic acids and derivatives	Amino acids, peptides, and analogues	106.05	86.9396	105.043	0.658665	C3H7NO3	[M+H]+	9.4332e-06	BioDeepDB	C00065	HMDB0000187	5951	56-45-1
M175T85_2	L-Arginine	Amino acid	Arginine biosynthesis	Carboxylic acids and derivatives	Amino acids, peptides, and analogues	175.119	85.4341	174.112	0.0704712	C6H14N4O2	[M+H]+	1.6028e-10	BioDeepDB	C00062	HMDB0000517	6322	74-79-3
M342T93	Cellobiose	Carbohydrate	Starch and sucrose metabolism	NULL	NULL	342.139	93.0664	342.116	0.128006	C12H22O11	[M]+	2.93249e-06	BioDeepDB	C00185	HMDB0000055	439178	16462-44-5 / 528-50-7
M398T764	S-Adenosylmethionine	Cofactors and Vitamins	Cofactors	NULL	NULL	398.24	763.899	398.137	1.52746	C15H22N6O5S	[M]+	8.22706e-09	BioDeepDB	C00019	NULL	34755	17176-17-9
M161T93	D-Fructose	Carbohydrate	Fructose and mannose metabolism	NULL	NULL	161.044	93.0024	180.063	8.81494	C6H12O6	[M-H2O-H]-	0.000108617	BioDeepDB	C00095	HMDB0000660	439163	57-48-7
M173T103_3	N-Acetylornithine	Amino acid	Arginine biosynthesis	Carboxylic acids and derivatives	Amino acids, peptides, and analogues	173.092	102.907	174.1	6.62318	C7H14N2O3	[M-H]-	2.20051e-08	BioDeepDB	C00437	HMDB0003357	439232	6205-08-9/2185-16-2
M295T834	13-L-Hydroperoxylinoleic acid	Lipid	Linoleic acid metabolism	Fatty Acyls	Lineolic acids and derivatives	295.227	833.653	312.23	0.086228	C18H32O4	[M+H-H2O]+	4.91149e-12	BioDeepDB	C04717	HMDB0003871	5280720	33964-75-9
M295T665	9(S)-HPODE	Lipid	Linoleic acid metabolism	Fatty Acyls	Lineolic acids and derivatives	295.228	664.531	312.23	1.90037	C18H32O4	[M+H-H2O]+	1.14824e-08	BioDeepDB	C14827	HMDB0006940	9548877	29774-12-7
M166T311_2	L-Phenylalanine	Amino acid	Phenylalanine metabolism	Carboxylic acids and derivatives	Amino acids, peptides, and analogues	166.086	310.955	165.079	3.43518	C9H11NO2	[M+H]+	2.3911e-08	MoNA	C00079	HMDB0000159	6140	63-91-2
M188T314	Kynurenic acid	Amino acid	Tryptophan metabolism	Quinolines and derivatives	Quinoline carboxylic acids	188.035	313.9	189.043	0.249372	C10H7NO3	[M-H]-	5.4003e-05	BioDeepDB	C01717	HMDB0000715	3845	492-27-3
M328T270	Cyclic AMP	Nucleotide	Purine metabolism	Purine nucleotides	Cyclic purine nucleotides	328.045	269.909	329.053	0.208517	C10H12N5O6P	[M-H]-	4.86257e-12	BioDeepDB	C00575	HMDB0000058	6076	60-92-4
M167T394	3,4-Dihydroxymandelic acid	Amino acid	Tyrosine metabolism	Phenols	Benzenediols	167.034	393.899	184.037	0.809907	C8H8O5	[M+H-H2O]+	0.00385704	BioDeepDB	C05580	HMDB0001866	85782	775-01-9
M284T829	Sphinganine	Lipid	SphingoLipid	Organonitrogen compounds	Alcohols and polyols	284.295	829.385	301.298	13.7413	C18H39NO2	[M+H-H2O]+	1.31742e-05	MetaDNA	C00836	HMDB0000269	91486	764-22-7
M146T95	(S)-2-amino-6-oxohexanoate	Amino acid	Lysine biosynthesis	Carboxylic acids and derivatives	Amines	146.08	95.3577	145.074	4.92646	C6H11NO3	[M+H]+	0.00770358	MetaDNA	C04076	HMDB0059595	160603	NULL
M134T338	Chavicol	Unknow	Unknow	Benzene and substituted derivatives	1-hydroxy-2-unsubstituted benzenoids	134.071	338.087	134.073	13.7609	C9H10O	[M]+	0.0368068	MetaDNA	C16930	HMDB0034107	68148	501-92-8
M257T755	(2R,3R)-3-Methylornithinyl-N6-lysine	Amino acid	Lysine biosynthesis	NULL	NULL	257.19	754.837	274.2	12.9128	C12H26N4O3	[M+H-H2O]+	0.0920625	MetaDNA	C20278	NULL	57339222	NULL
M295T99	Prunasin	Amino acid	CyanoAmino acid	Benzene and substituted derivatives	Alcohols and polyols	295.102	99.3726	295.106	10.8806	C14H17NO6	[M]+	0.000113106	MetaDNA	C00844	HMDB0034934	119033	99-18-3
M165T180	4-Hydroxycinnamic acid	Xenobiotics	Food Component/Plant	Benzene and substituted derivatives	1-hydroxy-2-unsubstituted benzenoids	165.055	180.04	164.047	3.20502	C9H8O3	[M+H]+	0.000204972	MetaDNA	C00811	HMDB0002035	637542	7400-08-0/7400-08-0 501-98-4/501-98-4
M263T116	Mannitol 1-phosphate	Carbohydrate	Fructose and mannose metabolism	Organic oxides	Alcohols and polyols	263.052	115.816	262.045	0.834224	C6H15O9P	[M+H]+	0.000708439	MetaDNA	C00644	HMDB0001530	130418	15806-48-1
M423T92	Lactose 6-phosphate	Carbohydrate	Galactose metabolism	Organic oxides	Alcohols and polyols	423.089	91.9085	422.082	2.5683	C12H23O14P	[M+H]+	1.29464e-05	MetaDNA	C05396	HMDB0006789	440654	NULL
M128T81	O-Acetylserine	Amino acid	Cysteine and methionine metabolism	Carboxylic acids and derivatives	Amines	128.034	80.867	147.053	9.8773	C5H9NO4	[M-H2O-H]-	0.000363063	MetaDNA	C00979	HMDB0003011	99478	5147-00-2
M299T98	7-Methylxanthosine	Xenobiotics	Caffeine metabolism	Azacyclic compounds	Alcohols and polyols	299.098	98.0554	299.099	3.98089	C11H15N4O6	[M]-	0.0116236	MetaDNA	C16352	NULL	23724732	NULL
M267T445	Inosine	Nucleotide	Purine metabolism	Azacyclic compounds	Alcohols and polyols	267.072	445.098	268.081	5.70232	C10H12N4O5	[M-H]-	0.0007178	MetaDNA	C00294	HMDB0000195	135398641	58-63-9
M266T99	Adenosine	Nucleotide	Purine metabolism	Azacyclic compounds	Alcohols and polyols	266.088	99.2417	267.097	6.62387	C10H13N5O4	[M-H]-	0.000351211	MetaDNA	C00212	HMDB0000050	60961	58-61-7
M172T103_1	N-Acetyl-L-glutamate 5-semialdehyde	Amino acid	Arginine biosynthesis	Carboxylic acids and derivatives	Amino acids, peptides, and analogues	172.061	103.441	173.069	2.12472	C7H11NO4	[M-H]-	0.00823622	MetaDNA	C01250	HMDB0006488	192878	13074-21-0
M101T367	Succinic acid semialdehyde	Carbohydrate	Butanoate metabolism	Carboxylic acids and derivatives	Carbonyl compounds	101.023	367.418	102.032	9.72142	C4H6O3	[M-H]-	0.0135032	MetaDNA	C00232	HMDB0001259	1112	692-29-5
M299T193	4-(beta-D-Glucosyloxy)benzoate	Cofactors and Vitamins	Ubiquinone and other terpenoid-quinone biosynthesis	Benzene and substituted derivatives	Alcohols and polyols	299.077	192.953	300.084	0.0560249	C13H16O8	[M-H]-	0.0208956	MetaDNA	C03993	NULL	440186	NULL
M165T82	L-Xylonate	Carbohydrate	Pentose and glucuronate interconversions	Carboxylic acids and derivatives	Alcohols and polyols	165.038	82.4201	166.048	12.7484	C5H10O6	[M-H]-	7.82625e-05	MetaDNA	C05411	HMDB0060256	6971043	NULL
M165T94	L-Lyxonate	Carbohydrate	Pentose and glucuronate interconversions	Carboxylic acids and derivatives	Alcohols and polyols	165.039	94.3255	166.048	6.13721	C5H10O6	[M-H]-	0.015142	MetaDNA	C05412	NULL	644110	4172-43-4
M249T471	2-O-(alpha-D-Mannosyl)-D-glycerate	Carbohydrate	Fructose and mannose metabolism	Carboxylic acids and derivatives	Alcohols and polyols	249.061	471.136	268.079	0.0439176	C9H16O9	[M-H2O-H]-	0.0784796	MetaDNA	C11544	NULL	5460194	NULL
M147T83	D-Xylonate	Carbohydrate	Pentose and glucuronate interconversions	Carboxylic acids and derivatives	Alcohols and polyols	147.028	82.5955	166.048	6.91794	C5H10O6	[M-H2O-H]-	0.000786413	MetaDNA	C00502	HMDB0059750	6602431	526-91-0
M311T100	Dhurrin	Amino acid	CyanoAmino acid	Benzene and substituted derivatives	1-hydroxy-2-unsubstituted benzenoids	311.098	100.389	311.101	6.94776	C14H17NO7	[M]-	4.62947e-06	MetaDNA	C05143	HMDB0060471	161355	499-20-7
M103T83	Tartronate semialdehyde	Carbohydrate	Glyoxylate and dicarboxylate metabolism	Carboxylic acids and derivatives	Alcohols and polyols	103.002	82.7163	104.011	13.1402	C3H4O4	[M-H]-	0.0015952	MetaDNA	C01146	HMDB0006938	1122	2480-77-5
M161T444	scyllo-Inositol	Carbohydrate	Inositol phosphate metabolism	Organooxygen compounds	Alcohols and polyols	161.043	443.765	180.063	11.1897	C6H12O6	[M-H2O-H]-	0.00109971	MetaDNA	C06153	HMDB0006088	892	488-59-5
M241T111	Mannose 6-phosphate	Carbohydrate	Amino sugar and nucleotide sugar metabolism	Organic oxides	Alcohols and polyols	241.011	110.678	260.03	0.323068	C6H13O9P	[M-H2O-H]-	0.00092973	MetaDNA	C00275	HMDB0001078	65127	3672-15-9/NA
M296T806	13S-hydroxyoctadecadienoic acid	Lipid	Linoleic acid metabolism	Carboxylic acids and derivatives	Alcohols and polyols	296.231	805.932	296.235	13.976	C18H32O3	[M]-	0.00164186	MetaDNA	C14762	HMDB0004667	6443013	5204-88-6/29623-28-7
M104T91	Dimethylglycine	Amino acid	Glycine, serine and threonine metabolism	Carboxylic acids and derivatives	Amino acids, peptides, and analogues	104.071	90.7845	103.063	0.938558	C4H9NO2	[M+H]+	0.00012209	BioDeepDB	C01026	HMDB0000092	673	1118-68-9
M126T48	Taurine	Amino acid	Taurine and hypotaurine metabolism	Organic sulfonic acids and derivatives	Organosulfonic acids and derivatives	125.986	48.2793	125.015	1.13712	C2H7NO3S	[M+H]+	0.0242208	BioDeepDB	C00245	HMDB0000251	1123	107-35-7
M102T127	2-Ketobutyric acid	Carbohydrate	Propanoate metabolism	Keto acids and derivatives	Short-chain keto acids and derivatives	102.056	126.572	102.032	3.3042	C4H6O3	[M]+	0.00145675	BioDeepDB	C00109	HMDB0000005	58	600-18-0
M159T315	4,5-Dihydroorotic acid	Nucleotide	Pyrimidine metabolism	Carboxylic acids and derivatives	Amino acids, peptides, and analogues	158.961	314.964	158.033	0.131719	C5H6N2O4	[M+H]+	0.00266184	BioDeepDB	C00337	HMDB0000528	439216	155-54-4 / 5988-19-2
M116T98_2	L-Proline	Amino acid	Arginine and proline metabolism	Carboxylic acids and derivatives	Amino acids, peptides, and analogues	116.07	98.1267	115.063	4.25774	C5H9NO2	[M+H]+	3.93431e-11	BioDeepDB	C00148	HMDB0000162	145742	147-85-3
M155T534	Gentisic acid	Amino acid	Tyrosine metabolism	Benzene and substituted derivatives	Benzoic acids and derivatives	154.989	533.813	154.027	5.51567	C7H6O4	[M+H]+	0.00471767	BioDeepDB	C00628	HMDB0000152	3469	490-79-9
M182T304	4-Pyridoxic acid	Cofactors and Vitamins	Vitamin B6 metabolism	Pyridines and derivatives	Pyridinecarboxylic acids and derivatives	182.045	304.408	183.053	4.82375	C8H9NO4	[M-H]-	6.14733e-06	BioDeepDB	C00847	HMDB0000017	6723	82-82-6
M142T170	O-Phosphoethanolamine	Lipid	GlycerophosphoLipid	Organic phosphoric acids and derivatives	Phosphate esters	141.959	170.381	141.019	0.0108698	C2H8NO4P	[M+H]+	0.0231012	BioDeepDB	C00346	HMDB0000224	1015	1071-23-4
M113T185	Uracil	Nucleotide	Pyrimidine metabolism	Diazines	Pyrimidines and pyrimidine derivatives	113.035	185.489	112.027	0.227889	C4H4N2O2	[M+H]+	0.00658824	BioDeepDB	C00106	HMDB0000300	1174	66-22-8
M113T836	Creatinine	Amino acid	Arginine and proline metabolism	Carboxylic acids and derivatives	Amino acids, peptides, and analogues	112.984	835.803	113.059	4.17184	C4H7N3O	[M]-	4.5121e-07	BioDeepDB	C00791	HMDB0000562	588	60-27-5
M200T395	Dodecanoic acid	Lipid	Fatty acid biosynthesis	Fatty Acyls	Fatty acids and conjugates	199.988	394.553	200.178	2.65357	C12H24O2	[M]+	0.0291191	BioDeepDB	C02679	HMDB0000638	3893	143-07-7
M377T413	Riboflavin	Cofactors and Vitamins	Riboflavin metabolism	Pteridines and derivatives	Alloxazines and isoalloxazines	377.144	413.055	376.138	3.87788	C17H20N4O6	[M+H]+	1.43776e-12	BioDeepDB	C00255	HMDB0000244	493570	83-88-5
M181T701	4-Hydroxyphenylpyruvic acid	Amino acid	Tyrosine metabolism	Benzene and substituted derivatives	Phenylpyruvic acid derivatives	181.05	700.99	180.042	0.68539	C9H8O4	[M+H]+	0.00134606	BioDeepDB	C01179	HMDB0000707	979	156-39-8
M105T72	Diethanolamine	Lipid	GlycerophosphoLipid	Organonitrogen compounds	Amines	105.004	72.246	105.079	0.216212	C4H11NO2	[M]+	1.68856e-05	BioDeepDB	C06772	HMDB0004437	8113	111-42-2
M243T342	1-Hexadecanol	Lipid	Fatty acid degradation	Fatty Acyls	Fatty alcohols	243.183	341.516	242.261	1.41252	C16H34O	[M+H]+	0.00144587	BioDeepDB	C00823	HMDB0003424	2682	36653-82-4
M133T87	L-Asparagine	Amino acid	Alanine, aspartate and glutamate metabolism	Carboxylic acids and derivatives	Amino acids, peptides, and analogues	133.061	86.997	132.054	0.889716	C4H8N2O3	[M+H]+	7.92949e-10	BioDeepDB	C00152	HMDB0000168	6267	70-47-3
M226T795	Porphobilinogen	Cofactors and Vitamins	Porphyrin and chlorophyll metabolism	Organonitrogen compounds	Amines	226.18	794.673	226.095	1.69146	C10H14N2O4	[M]+	0.0278696	BioDeepDB	C00931	HMDB0000245	1021	487-90-1
M160T171	Pimelic acid	Cofactors and Vitamins	Biotin metabolism	Fatty Acyls	Fatty acids and conjugates	159.969	171.248	160.074	1.9944	C7H12O4	[M]+	0.0100363	BioDeepDB	C02656	HMDB0000857	385	111-16-0
M227T708	Deoxycytidine	Nucleotide	Pyrimidine metabolism	Pyrimidine nucleosides	Pyrimidine 2'-deoxyribonucleosides	227.164	707.598	227.091	3.08868	C9H13N3O4	[M]+	2.62749e-08	BioDeepDB	C00881	HMDB0000014	13711	951-77-9
M195T97	Gluconic acid	Carbohydrate	Pentose phosphate pathway	Organooxygen compounds	Carbohydrates and carbohydrate conjugates	195.05	97.4392	196.058	7.49755	C6H12O7	[M-H]-	2.54951e-05	MoNA	C00257	HMDB0000625	10690	526-95-4
M121T73	L-Cysteine	Amino acid	Cysteine and methionine metabolism	Carboxylic acids and derivatives	Amino acids, peptides, and analogues	120.981	73.3351	121.02	0.310618	C3H7NO2S	[M]+	0.0123696	BioDeepDB	C00097	HMDB0000574	5862	52-90-4
M153T63	Ribitol	Carbohydrate	Pentose and glucuronate interconversions	Organooxygen compounds	Carbohydrates and carbohydrate conjugates	152.995	63.1404	152.069	1.67113	C5H12O5	[M+H]+	0.0441226	BioDeepDB	C00474	HMDB0000508	6912	488-81-3
M306T102	CMP	Nucleotide	Pyrimidine metabolism	Pyrimidine nucleotides	Pyrimidine ribonucleotides	306.048	101.65	323.052	12.2118	C9H14N3O8P	[M+H-H2O]+	9.10837e-16	BioDeepDB	C00055	HMDB0000095	6131	63-37-6
M244T103_1	Cytidine	Nucleotide	Pyrimidine metabolism	NULL	NULL	244.092	102.825	243.085	1.4995	C9H13N3O5	[M+H]+	1.46835e-07	BioDeepDB	C00475	HMDB0000089	6175	65-46-3
M256T782	Palmitic acid	Lipid	Fatty acid biosynthesis	Fatty Acyls	Fatty acids and conjugates	256.262	781.955	256.24	3.20374	C16H32O2	[M-H2O+NH4]+	0.000122421	BioDeepDB	C00249	HMDB0000220	985	1957-10-03
M346T198	GMP	Nucleotide	Purine metabolism	Purine nucleotides	Purine ribonucleotides	346.054	198.205	363.058	10.9261	C10H14N5O8P	[M+H-H2O]+	6.25993e-11	BioDeepDB	C00144	HMDB0001397	135398631	85-32-5
M298T351	5-Methylthioadenosine	Amino acid	Cysteine and methionine metabolism	5'-deoxyribonucleosides	5'-deoxy-5'-thionucleosides	298.096	350.715	297.09	3.22722	C11H15N5O3S	[M+H]+	0.000272869	BioDeepDB	C00170	HMDB0001173	439176	2457-80-9
M346T769	Cyclic GMP	Nucleotide	Purine metabolism	Purine nucleotides	Cyclic purine nucleotides	346.331	768.82	345.047	0.0333108	C10H12N5O7P	[M+H]+	0.00733585	BioDeepDB	C00942	HMDB0001314	135398570	7665-99-8
M267T823	Stearic acid	Lipid	Fatty acid biosynthesis	Fatty Acyls	Fatty acids and conjugates	267.172	822.586	284.272	2.18846	C18H36O2	[M+H-H2O]+	3.46339e-06	BioDeepDB	C01530	HMDB0000827	5281	57-11-4 / 646-29-7
M430T496	alpha-Tocopherol	Cofactors and Vitamins	Ubiquinone and other terpenoid-quinone biosynthesis	Prenol lipids	Quinone and hydroquinone lipids	430.242	496.115	430.381	0.733722	C29H50O2	[M]+	8.18513e-09	BioDeepDB	C02477	HMDB0001893	14985	1959-02-09
M319T460	12-Keto-tetrahydro-leukotriene B4	Lipid	Arachidonic acid metabolism	Fatty Acyls	Eicosanoids	319.227	459.635	336.23	1.45665	C20H32O4	[M+H-H2O]+	5.62297e-05	BioDeepDB	C02165	HMDB0002995	5280492	71160-24-2
M193T153	Citric acid	Carbohydrate	Citrate cycle (TCA cycle)	Carboxylic acids and derivatives	Tricarboxylic acids and derivatives	193.034	153.142	192.027	0.839123	C6H8O7	[M+H]+	1.41197e-05	BioDeepDB	C00158	HMDB0000094	311	77-92-9/126-44-3
M118T93	Betaine	Amino acid	Glycine, serine and threonine metabolism	Carboxylic acids and derivatives	Amino acids, peptides, and analogues	118.086	92.6811	117.079	2.18388	C5H11NO2	[M+H]+	2.02449e-07	BioDeepDB	C00719	HMDB0000043	247	107-43-7/590-46-5
M90T88	L-Alanine	Amino acid	Alanine, aspartate and glutamate metabolism	Carboxylic acids and derivatives	Amino acids, peptides, and analogues	90.0554	87.5228	89.0477	5.05481	C3H7NO2	[M+H]+	1.39804e-06	MoNA	C00041	HMDB0000161	5950	56-41-7
M282T814	Sphingosine	Lipid	SphingoLipid	Organonitrogen compounds	Amines	282.278	814.397	299.282	11.5409	C18H37NO2	[M+H-H2O]+	2.54824e-07	BioDeepDB	C00319	HMDB0000252	5280335	123-78-4
M136T103_2	Adenine	Nucleotide	Purine metabolism	Imidazopyrimidines	Purines and purine derivatives	136.061	102.828	135.054	4.09111	C5H5N5	[M+H]+	1.17547e-08	BioDeepDB	C00147	HMDB0000034	190	73-24-5
M152T103	Guanine	Nucleotide	Purine metabolism	Imidazopyrimidines	Purines and purine derivatives	152.056	102.854	151.049	3.68797	C5H5N5O	[M+H]+	2.26238e-09	BioDeepDB	C00242	HMDB0000132	135398634	73-40-5
M120T89	L-Threonine	Amino acid	Glycine, serine and threonine metabolism	Carboxylic acids and derivatives	Amino acids, peptides, and analogues	120.066	89.0527	119.058	1.43685	C4H9NO3	[M+H]+	2.29243e-15	BioDeepDB	C00188	HMDB0000167	6288	72-19-5
M124T102	Nicotinic acid	Cofactors and Vitamins	Nicotinate and nicotinamide metabolism	Pyridines and derivatives	Pyridinecarboxylic acids and derivatives	124.039	102.41	123.032	0.111484	C6H5NO2	[M+H]+	3.40444e-05	BioDeepDB	C00253	HMDB0001488	938	59-67-6
M283T713	Oleic acid	Lipid	Fatty acid biosynthesis	Fatty Acyls	Fatty acids and conjugates	283.266	712.971	282.256	11.3034	C18H34O2	[M+H]+	1.18196e-10	BioDeepDB	C00712	HMDB0000207	445639	112-80-1
M184T88	Phosphorylcholine	Lipid	GlycerophosphoLipid	Organonitrogen compounds	Quaternary ammonium salts	184.074	87.9818	184.074	1.12721	C5H15NO4P	[M+H]+	1.72749e-07	BioDeepDB	C00588	HMDB0001565	1014	3616-04-4/107-73-3
M255T739	16-Hydroxy hexadecanoic acid	Lipid	Cutin, suberine and wax biosynthesis	Fatty Acyls	Fatty acids and conjugates	255.229	738.618	272.235	4.32728	C16H32O3	[M+H-H2O]+	2.04758e-13	BioDeepDB	C18218	HMDB0006294	10466	506-13-8
M176T91	Citrulline	Amino acid	Arginine biosynthesis	Carboxylic acids and derivatives	Amino acids, peptides, and analogues	176.103	90.7891	175.096	0.0249203	C6H13N3O3	[M+H]+	8.02847e-09	BioDeepDB	C00327	HMDB0000904	9750	372-75-8
M190T182	N-Acetylglutamic acid	Amino acid	Arginine biosynthesis	Carboxylic acids and derivatives	Amino acids, peptides, and analogues	190.071	181.595	189.064	0.507698	C7H11NO5	[M+H]+	8.79393e-06	BioDeepDB	C00624	HMDB0001138	70914	1188-37-0
M162T99	Aminoadipic acid	Amino acid	Lysine biosynthesis	Carboxylic acids and derivatives	Amino acids, peptides, and analogues	162.077	99.3581	161.069	5.26943	C6H11NO4	[M+H]+	2.40065e-08	BioDeepDB	C00956	HMDB0000510	92136	542-32-5/1118-90-7
M265T435	(S)-Abscisic acid	Lipid	Carotenoid biosynthesis	Prenol lipids	Sesquiterpenoids	265.143	434.754	264.136	0.2122	C15H20O4	[M+H]+	6.50743e-08	BioDeepDB	C06082	HMDB0035140	5280896	21293-29-8
M163T151_2	Nicotine	Xenobiotics	Tobacco metabolite	Pyridines and derivatives	Pyrrolidinylpyridines	163.124	151.336	162.116	3.14465	C10H14N2	[M+H]+	9.474e-05	BioDeepDB	C00745	HMDB0001934	89594	1954-11-05
M219T492	Capsidiol	Lipid	Sesquiterpenoid and triterpenoid biosynthesis	Prenol lipids	Sesquiterpenoids	219.175	492.058	236.178	1.04521	C15H24O2	[M+H-H2O]+	1.34301e-07	BioDeepDB	C09627	HMDB0002352	161937	37208-05-2
M295T766	9-OxoODE	Lipid	Linoleic acid metabolism	Fatty Acyls	Lineolic acids and derivatives	295.228	766.362	294.219	3.38259	C18H30O3	[M+H]+	3.62261e-06	mzCloud	C14766	HMDB0004669	9839084	54232-59-6
M293T791	9(S)-HPOT	Lipid	alpha-Linolenic acid metabolism	NULL	NULL	293.211	791.042	310.214	0.0100407	C18H30O4	[M+H-H2O]+	2.99072e-07	BioDeepDB	C16321	NULL	6450029	111004-08-1
M149T412	Estragole	Unknow	Unknow	Phenol ethers	Anisoles	149.097	411.936	148.089	4.4686	C10H12O	[M+H]+	7.52406e-05	BioDeepDB	C10452	HMDB0034121	8815	140-67-0
M301T793_2	12-KETE	Lipid	Arachidonic acid metabolism	Fatty Acyls	Fatty acids and conjugates	301.216	792.867	318.219	12.166	C20H30O3	[M+H-H2O]+	1.86594e-10	BioDeepDB	C14807	HMDB0013633	5283162	108437-64-5
M303T808	19(S)-HETE	Lipid	Arachidonic acid metabolism	Fatty Acyls	Eicosanoids	303.232	807.56	320.235	14.1937	C20H32O3	[M+H-H2O]+	1.79493e-13	BioDeepDB	C14749	HMDB0011136	9548883	79551-85-2/115461-40-0
M335T766	Prostaglandin H2	Lipid	Arachidonic acid metabolism	Fatty Acyls	Eicosanoids	335.219	766.389	352.225	5.38529	C20H32O5	[M+H-H2O]+	3.78265e-10	BioDeepDB	C00427	HMDB0001381	445049	42935-17-1
M118T107_2	L-Valine	Amino acid	Valine, leucine and isoleucine degradation	Carboxylic acids and derivatives	Amino acids, peptides, and analogues	118.086	106.727	117.079	2.17824	C5H11NO2	[M+H]+	1.57856e-08	MoNA	C00183	HMDB0000883	6287	72-18-4
M148T90_2	L-Glutamic acid	Amino acid	Alanine, aspartate and glutamate metabolism	Carboxylic acids and derivatives	Amino acids, peptides, and analogues	148.059	90.1835	147.053	10.6009	C5H9NO4	[M+H]+	1.46421e-11	MoNA	C00025	HMDB0000148	33032	56-86-0
M147T88_2	L-Glutamine	Amino acid	D-Glutamine and D-glutamate metabolism	Carboxylic acids and derivatives	Amino acids, peptides, and analogues	147.076	87.9284	146.069	3.83467	C5H10N2O3	[M+H]+	1.12441e-10	MoNA	C00064	HMDB0000641	5961	56-85-9
M221T823	N-Acetyl-D-glucosamine	Carbohydrate	Amino sugar and nucleotide sugar metabolism	Organooxygen compounds	Carbohydrates and carbohydrate conjugates	221.154	822.77	221.09	0.0895091	C8H15NO6	[M]-	5.33095e-05	BioDeepDB	C00140	HMDB0000215	439174	7512-17-6
M136T447	2-Phenylacetamide	Amino acid	Phenylalanine metabolism	Benzene and substituted derivatives	Phenylacetamides	136.076	447.43	135.068	3.00344	C8H9NO	[M+H]+	8.12875e-06	MoNA	C02505	HMDB0010715	7680	103-81-1
M177T94_1	Allantoic acid	Nucleotide	Purine metabolism	Carboxylic acids and derivatives	Amino acids, peptides, and analogues	177.062	93.6044	176.055	0.0436787	C4H8N4O4	[M+H]+	0.000368014	MoNA	C00499	HMDB0001209	203	99-16-1
M150T145	L-Methionine	Amino acid	Cysteine and methionine metabolism	Carboxylic acids and derivatives	Amino acids, peptides, and analogues	150.058	145.258	149.051	3.82171	C5H11NO2S	[M+H]+	0.000196212	MoNA	C00073	HMDB0000696	6137	63-68-3
M191T95	Diaminopimelic acid	Amino acid	Lysine biosynthesis	Carboxylic acids and derivatives	Amino acids, peptides, and analogues	191.103	95.4162	190.095	0.480053	C7H14N2O4	[M+H]+	0.0163712	MoNA	C00666	HMDB0001370	439283	583-93-7/14289-34-0/NA
M487T97	Raffinose	Carbohydrate	Galactose metabolism	Organooxygen compounds	Carbohydrates and carbohydrate conjugates	487.164	96.5536	504.169	4.43804	C18H32O16	[M+H-H2O]+	1.25571e-09	mzCloud	C00492	HMDB0003213	439242	512-69-6
M245T166	Uridine	Nucleotide	Pyrimidine metabolism	Pyrimidine nucleosides	NULL	245.077	166.211	244.07	1.25728	C9H12N2O6	[M+H]+	2.72819e-08	MoNA	C00299	HMDB0000296	6029	58-96-8
M217T296	beta-Alanyl-L-lysine	Amino acid	beta-Alanine metabolism	Peptidomimetics	Hybrid peptides	217.155	295.61	217.143	0.0255381	C9H19N3O3	[M]+	0.00036643	BioDeepDB	C05341	HMDB0060442	440638	NULL
M261T91	D-Glucose 1-phosphate	Carbohydrate	Glycolysis / Gluconeogenesis	Organooxygen compounds	Carbohydrates and carbohydrate conjugates	261.037	90.7891	260.03	0.981722	C6H13O9P	[M+H]+	8.40211e-06	mzCloud	C00103	HMDB0001586	65533	59-56-3
M189T83	N6,N6,N6-Trimethyl-L-lysine	Amino acid	Lysine degradation	Carboxylic acids and derivatives	Amino acids, peptides, and analogues	189.16	82.5005	188.153	0.531753	C9H20N2O2	[M+H]+	5.3822e-06	mzCloud	C03793	HMDB0001325	440120	c(19253-88-4, 55528-53-5)
M276T98	Saccharopine	Amino acid	Lysine biosynthesis	Carboxylic acids and derivatives	Amino acids, peptides, and analogues	276.119	97.7741	276.132	0.270743	C11H20N2O6	[M]+	0.000101437	BioDeepDB	C00449	HMDB0000279	160556	997-68-2
M255T680	(9Z)-Hexadecenoic acid	Lipid	Fatty acid biosynthesis	Fatty Acyls	Fatty acids and conjugates	255.232	679.981	254.225	1.09989	C16H30O2	[M+H]+	2.51718e-10	mzCloud	C08362	HMDB0003229	445638	373-49-9
M99T60	Hydrogen phosphate	Energy	Oxidative phosphorylation	Non-metal oxoanionic compounds	Non-metal phosphates	98.9845	60.1175	97.9769	0.13621	H3PO4	[M+H]+	0.0445158	BioDeepDB	C00009	HMDB0000973	1004	14066-19-4 / 7664-38-2 / 14265-44-2
M164T72	L-Rhamnofuranose	Carbohydrate	Fructose and mannose metabolism	NULL	NULL	164.066	72.246	164.069	4.37559	C6H12O5	[M]+	0.00082129	BioDeepDB	C02431	NULL	11953811	NULL
M330T100_1	Salutaridinol	Unknow	Unknow	NULL	NULL	330.139	99.5631	329.163	1.75411	C19H23NO4	[M+H]+	6.69758e-06	BioDeepDB	C05220	NULL	5460042	3271-79-2
M256T103	Nicotinate D-ribonucleoside	Cofactors and Vitamins	Nicotinate and nicotinamide metabolism	Organooxygen compounds	Carbohydrates and carbohydrate conjugates	256.081	102.924	256.082	1.46122	C11H14NO6	[M]+	0.00116818	BioDeepDB	C05841	HMDB0006809	161234	NULL
M140T139	Acetylphosphate	Carbohydrate	Pyruvate metabolism	Organic phosphoric acids and derivatives	Phosphate esters	139.981	139.359	139.988	4.72006	C2H5O5P	[M]+	2.29145e-05	BioDeepDB	C00227	HMDB0001494	186	590-54-5
M171T317	Limonene-1,2-diol	Lipid	Limonene and pinene degradation	NULL	NULL	171.148	316.89	170.131	4.53658	C10H18O2	[M+H]+	0.00151809	BioDeepDB	C07276	NULL	441246	1946-00-5
M112T103_3	Histamine	Amino acid	Histidine metabolism	Organonitrogen compounds	Amines	112.087	103.113	111.08	0.11384	C5H9N3	[M+H]+	0.00298113	BioDeepDB	C00388	HMDB0000870	774	51-45-6
M145T93	2-Keto-glutaramic acid	Amino acid	Alanine, aspartate and glutamate metabolism	Keto acids and derivatives	Short-chain keto acids and derivatives	145.05	93.0361	145.037	3.90897	C5H7NO4	[M]+	7.73458e-06	BioDeepDB	C00940	HMDB0001552	48	18465-19-5
M211T571	(+)-7-Isojasmonic acid	Lipid	alpha-Linolenic acid metabolism	NULL	NULL	211.132	571.311	210.126	0.893709	C12H18O3	[M+H]+	1.3228e-05	BioDeepDB	C16317	NULL	7251183	62653-85-4
M272T98	(S)-Norcoclaurine	Unknow	Unknow	NULL	NULL	272.134	97.5541	271.121	2.04611	C16H17NO3	[M+H]+	4.14864e-06	BioDeepDB	C06160	NULL	440927	22672-77-1
M258T90	Glycerophosphocholine	Lipid	GlycerophosphoLipid	Glycerophospholipids	Glycerophosphocholines	258.11	89.6531	258.111	0.688827	C8H21NO6P	[M]+	3.48198e-06	BioDeepDB	C00670	HMDB0000086	439285	28319-77-9
M169T435	(1S,4R)-1-Hydroxy-2-oxolimonene	Lipid	Limonene and pinene degradation	NULL	NULL	169.123	435.475	168.115	5.7659	C10H16O2	[M+H]+	0.0184635	BioDeepDB	C11937	NULL	443522	24047-73-2 / 24047-74-3
M536T839_1	Lycopene	Lipid	Carotenoid biosynthesis	NULL	NULL	536.434	839.055	536.438	5.74307	C40H56	[M]+	1.87141e-22	BioDeepDB	C05432	NULL	446925	502-65-8
M189T120	(Z)-But-1-ene-1,2,4-tricarboxylate	Amino acid	Lysine biosynthesis	Carboxylic acids and derivatives	Tricarboxylic acids and derivatives	189.039	120.141	188.032	1.3484	C7H8O6	[M+H]+	0.00163923	BioDeepDB	C04002	HMDB0060320	5280640	NULL
M309T717	2,3-Dinor-8-iso prostaglandin F2alpha	Lipid	Arachidonic acid metabolism	NULL	NULL	309.206	716.847	326.209	0.0137944	C18H30O5	[M+H-H2O]+	4.45082e-06	BioDeepDB	C14794	NULL	9548881	221664-05-7
M393T740	5-Dehydroavenasterol	Lipid	Steroid biosynthesis	Steroids and steroid derivatives	Stigmastanes and derivatives	393.351	740.012	410.355	8.57578	C29H46O	[M+H-H2O]+	0.00416982	BioDeepDB	C15783	HMDB0006852	23724575	NULL
M147T153	Methyloxaloacetate	Carbohydrate	C5-Branched dibasic acid metabolism	NULL	NULL	147.029	152.958	146.022	0.00327328	C5H6O5	[M+H]+	0.000218142	BioDeepDB	C06030	NULL	440890	NULL
M301T331	Salidroside	Amino acid	Tyrosine metabolism	NULL	NULL	301.126	331.001	300.121	7.93722	C14H20O7	[M+H]+	0.0445844	BioDeepDB	C06046	NULL	159278	10338-51-9
M422T375	Leukotriene E4	Lipid	Arachidonic acid metabolism	Fatty Acyls	Eicosanoids	422.238	374.686	439.239	14.5604	C23H37NO5S	[M+H-H2O]+	1.35486e-05	BioDeepDB	C05952	HMDB0002200	5280879	75715-89-8
M393T805	Gamma-Tocotrienol	Cofactors and Vitamins	Ubiquinone and other terpenoid-quinone biosynthesis	Prenol lipids	Quinone and hydroquinone lipids	393.314	805.261	410.318	8.02276	C28H42O2	[M+H-H2O]+	0.0486433	BioDeepDB	C14155	HMDB0012958	5282349	14101-61-2
M611T388_2	Cyanin	Lipid	Anthocyanin biosynthesis	NULL	NULL	611.155	387.876	611.161	8.54331	C27H31O16	[M+H]+	1.52006e-18	BioDeepDB	C08639	NULL	441688	20905-74-2 / 2611-67-8
M265T402	Subaphylline	Amino acid	Arginine and proline metabolism	Cinnamic acids and derivatives	Hydroxycinnamic acids and derivatives	265.155	402.172	264.147	0.289059	C14H20N2O3	[M+H]+	7.60182e-05	BioDeepDB	C10497	HMDB0033463	5281796	501-13-3
M427T774	Taraxerol	Lipid	Sesquiterpenoid and triterpenoid biosynthesis	Prenol lipids	Sesterterpenoids	427.358	773.574	426.386	1.14596	C30H50O	[M+H]+	1.27284e-06	BioDeepDB	C08637	HMDB0034920	92097	127-22-0
M267T484	Xanthoxic acid	Lipid	Carotenoid biosynthesis	NULL	NULL	267.159	484.169	266.152	0.0759493	C15H22O4	[M+H]+	4.73644e-06	BioDeepDB	C13454	NULL	5282223	NULL
M251T594	Xanthoxin	Lipid	Carotenoid biosynthesis	NULL	NULL	251.164	594.247	250.157	1.53772	C15H22O3	[M+H]+	2.64167e-05	BioDeepDB	C13453	NULL	5282222	8066-07-7 / 26932-58-1
M301T530	5-KETE	Lipid	Arachidonic acid metabolism	Fatty Acyls	Fatty acids and conjugates	301.216	529.554	318.219	11.4892	C20H30O3	[M+H-H2O]+	9.73013e-06	BioDeepDB	C14732	HMDB0010217	5283159	126432-17-5 / 106154-18-1
M159T161	Oxoadipic acid	Amino acid	Lysine biosynthesis	Keto acids and derivatives	Medium-chain keto acids and derivatives	158.977	161.103	160.037	1.76749	C6H8O5	[M-H]-	0.00522454	BioDeepDB	C00322	HMDB0000225	71	3184-35-8
M150T74	Tartaric acid	Carbohydrate	Glyoxylate and dicarboxylate metabolism	Organooxygen compounds	Carbohydrates and carbohydrate conjugates	150.011	74.1809	150.016	0.401009	C4H6O6	[M]-	0.00022726	BioDeepDB	C00898	HMDB0000956	444305	87-69-4 / 526-83-0
M360T736	Rosmarinic acid	Amino acid	Tyrosine metabolism	Cinnamic acids and derivatives	Hydroxycinnamic acids and derivatives	360.088	736.03	360.084	9.93511	C18H16O8	[M]-	7.93056e-07	MoNA	C01850	HMDB0003572	5281792	537-15-5/20283-92-5 537-15-5/20283-92-5
M173T104_1	Dehydroascorbate	Cofactors and Vitamins	Ascorbate and aldarate metabolism	NULL	NULL	173.008	103.775	174.016	1.53247	C6H6O6	[M-H]-	0.000184773	BioDeepDB	C05422	NULL	440667	490-83-5
M147T333	L-2-Hydroxyglutaric acid	Lipid	Hydroxy fatty acids	Fatty Acyls	Fatty acids and conjugates	146.965	332.506	148.037	0.484499	C5H8O5	[M-H]-	6.11837e-28	BioDeepDB	C03196	HMDB0000694	439939	13095-48-2
M133T75_3	L-Malic acid	Carbohydrate	Citrate cycle (TCA cycle)	Hydroxy acids and derivatives	Beta hydroxy acids and derivatives	133.054	74.5863	134.022	2.62721	C4H6O5	[M-H]-	2.07483e-06	BioDeepDB	C00149	HMDB0000156	222656	97-67-6 / 6915-15-7
M283T804	Guanosine	Nucleotide	Purine metabolism	Purine nucleosides	NULL	283.263	804.135	283.092	2.59453	C10H13N5O5	[M]-	8.80738e-08	BioDeepDB	C00387	HMDB0000133	135398635	118-00-3
M447T491_3	Astragalin	Lipid	Flavone and flavonol biosynthesis	Flavonoids	Flavonoid glycosides	447.092	491.131	448.101	2.63417	C21H20O11	[M-H]-	0.000117128	BioDeepDB	C12249	HMDB0037429	5282102	480-10-4
M147T86	Nornicotine	Unknow	Unknow	Pyridines and derivatives	Pyrrolidinylpyridines	146.965	86.4552	148.1	0.0719162	C9H12N2	[M-H]-	4.15577e-16	BioDeepDB	C06524	HMDB0001126	412	494-97-3
M147T354	trans-Cinnamate	Amino acid	Phenylalanine metabolism	NULL	NULL	146.965	353.728	148.052	0.0278747	C9H8O2	[M-H]-	5.78611e-18	BioDeepDB	C00423	NULL	444539	140-10-3
M105T82	Glyceric acid	Carbohydrate	Glyoxylate and dicarboxylate metabolism	Organooxygen compounds	Carbohydrates and carbohydrate conjugates	105.018	82.3947	106.027	1.02351	C3H6O4	[M-H]-	3.38597e-05	BioDeepDB	C00258	HMDB0000139	439194	473-81-4
M161T284	myo-Inositol	Carbohydrate	Inositol phosphate metabolism	Organooxygen compounds	Alcohols and polyols	161.045	283.847	180.063	2.54133	C6H12O6	[M-H2O-H]-	0.00026959	BioDeepDB	C00137	HMDB0000211	892	87-89-8/87-9-8
M339T80	Fructose 1,6-bisphosphate	Energy	Methane metabolism	Organooxygen compounds	Carbohydrates and carbohydrate conjugates	338.988	80.2467	339.996	2.77627	C6H14O12P2	[M-H]-	2.79283e-12	BioDeepDB	C00354	HMDB0001058	172313	488-69-7
M149T84	D-Xylose	Carbohydrate	Pentose and glucuronate interconversions	Organooxygen compounds	Carbohydrates and carbohydrate conjugates	149.044	83.6086	150.053	2.59347	C5H10O5	[M-H]-	1.11443e-05	BioDeepDB	C00181	HMDB0000098	135191	58-86-6
M129T301	Ketoleucine	Amino acid	Valine, leucine and isoleucine degradation	Keto acids and derivatives	Short-chain keto acids and derivatives	129.054	300.854	130.063	12.9962	C6H10O3	[M-H]-	0.00283537	BioDeepDB	C00233	HMDB0000695	70	816-66-0
M161T412	D-Galactose	Carbohydrate	Galactose metabolism	NULL	NULL	161.043	411.998	180.063	11.5565	C6H12O6	[M-H2O-H]-	0.000553662	BioDeepDB	C00124	NULL	6036	59-23-4 10257-28-0 / 10257-28-0 / 59-23-4
M113T655	Dihydrouracil	Nucleotide	Pyrimidine metabolism	Diazines	Pyrimidines and pyrimidine derivatives	112.984	654.683	114.043	4.53579	C4H6N2O2	[M-H]-	4.73982e-06	BioDeepDB	C00429	HMDB0000076	649	504-07-4
M161T163	D-Mannose	Carbohydrate	Fructose and mannose metabolism	Organooxygen compounds	Carbohydrates and carbohydrate conjugates	161.043	162.823	180.063	11.2712	C6H12O6	[M-H2O-H]-	0.00254428	BioDeepDB	C00159	HMDB0000169	18950	3458-28-4 / 3458-28-4 31103-86-3 / 530-26-7
M103T76	Malonate	Lipid	Fatty acid biosynthesis	NULL	NULL	103.002	75.9444	104.011	0.899695	C3H4O4	[M-H]-	2.96494e-06	BioDeepDB	C00383	NULL	867	141-82-2 / 156-80-9
M206T151	N-Acetyl-L-phenylalanine	Amino acid	Phenylalanine metabolism	Carboxylic acids and derivatives	Amino acids, peptides, and analogues	206.082	150.853	207.089	0.0183467	C11H13NO3	[M-H]-	0.0366886	BioDeepDB	C03519	HMDB0000512	74839	2018-61-3
M147T764	3-(2-Hydroxyphenyl)propanoic acid	Xenobiotics	Polycyclic aromatic hydrocarbon degradation	Phenylpropanoic acids	NULL	146.965	763.993	166.063	2.47788	C9H10O3	[M-H2O-H]-	5.34674e-30	BioDeepDB	C01198	HMDB0033752	873	495-78-3
M665T98_1	Stachyose	Carbohydrate	Galactose metabolism	NULL	NULL	665.21	98.0812	666.222	5.98347	C24H42O21	[M-H]-	2.864e-06	BioDeepDB	C01613	HMDB0003553	439531	54261-98-2
M285T651	Kaempferol	Lipid	Flavonoid biosynthesis	Flavonoids	Flavones	285.04	651.113	286.048	1.16873	C15H10O6	[M-H]-	0.00110496	MoNA	C05903	HMDB0005801	5280863	520-18-3
M177T79_2	Pyrophosphate	Energy	Oxidative phosphorylation	Non-metal oxoanionic compounds	Non-metal pyrophosphates	176.935	78.7463	177.943	5.0441	H4P2O7	[M-H]-	4.68666e-13	BioDeepDB	C00013	HMDB0000250	1023	14000-31-8/2466-09-3
M191T103	Glucaric acid	Cofactors and Vitamins	Ascorbate and aldarate metabolism	Organooxygen compounds	Carbohydrates and carbohydrate conjugates	191.019	103.441	210.038	0.267595	C6H10O8	[M-H2O-H]-	9.30291e-08	BioDeepDB	C00818	HMDB0000663	33037	25525-21-7/87-73-0
M209T85_1	Sedoheptulose	Energy	Carbon fixation in photosynthetic organisms	Organooxygen compounds	Carbohydrates and carbohydrate conjugates	209.066	84.7889	210.074	3.6503	C7H14O7	[M-H]-	1.36102e-05	BioDeepDB	C02076	HMDB0003219	439645	3019-74-7
M161T648	Umbelliferone	Unknow	Unknow	Coumarins and derivatives	Hydroxycoumarins	161.024	647.602	162.032	1.4036	C9H6O3	[M-H]-	0.00405171	BioDeepDB	C09315	HMDB0029865	5281426	93-35-6
M565T79_1	Uridine diphosphategalactose	Carbohydrate	Galactose metabolism	Pyrimidine nucleotides	Pyrimidine nucleotide sugars	565.045	78.5325	566.055	3.9774	C15H24N2O17P2	[M-H]-	3.75645e-11	BioDeepDB	C00052	HMDB0000302	23724458	2956-16-3
M145T75	Oxoglutaric acid	Carbohydrate	Citrate cycle (TCA cycle)	Keto acids and derivatives	Gamma-keto acids and derivatives	145.013	75.3088	146.022	7.8739	C5H6O5	[M-H]-	5.01744e-06	BioDeepDB	C00026	HMDB0000208	51	328-50-7/64-15-3
M117T76	Succinic acid	Carbohydrate	Citrate cycle (TCA cycle)	Carboxylic acids and derivatives	Dicarboxylic acids and derivatives	117.018	75.5005	118.027	7.03746	C4H6O4	[M-H]-	0.000282789	BioDeepDB	C00042	HMDB0000254	1110	110-15-6
M229T77	Xylulose 5-phosphate	Carbohydrate	Pentose phosphate pathway	Organooxygen compounds	Carbohydrates and carbohydrate conjugates	229.011	76.8907	230.019	3.45107	C5H11O8P	[M-H]-	3.19739e-12	BioDeepDB	C00231	HMDB0000868	439190	4212-65-1/60802-29-1/105931-44-0
M193T104_1	D-Glucuronic acid	Carbohydrate	Pentose and glucuronate interconversions	Organooxygen compounds	Carbohydrates and carbohydrate conjugates	193.035	103.506	194.043	3.87865	C6H10O7	[M-H]-	3.32327e-05	BioDeepDB	C00191	HMDB0000127	94715	6556-12-3/528-16-5
M137T333_2	4-Hydroxybenzoic acid	Xenobiotics	Benzoate degradation	Benzene and substituted derivatives	Benzoic acids and derivatives	137.024	332.809	138.032	4.73801	C7H6O3	[M-H]-	3.08101e-10	BioDeepDB	C00156	HMDB0000500	135	99-96-7/456-23-5
M177T103	Gluconolactone	Carbohydrate	Pentose phosphate pathway	Organooxygen compounds	Carbohydrates and carbohydrate conjugates	177.04	102.941	178.048	4.30355	C6H10O6	[M-H]-	1.27007e-06	BioDeepDB	C00198	HMDB0000150	7027	90-80-2
M203T332	L-Tryptophan	Amino acid	Tryptophan metabolism	Indoles and derivatives	Indolyl carboxylic acids and derivatives	203.082	331.546	204.09	4.18205	C11H12N2O2	[M-H]-	5.85031e-18	BioDeepDB	C00078	HMDB0000929	6305	73-22-3
M294T819	13-OxoODE	Lipid	Linoleic acid metabolism	Fatty Acyls	Lineolic acids and derivatives	294.215	819.159	294.219	13.9224	C18H30O3	[M]-	4.54034e-08	BioDeepDB	C14765	HMDB0004668	6446027	54739-30-9
M167T75	(2R)-2-Hydroxy-3-(phosphonatooxy)propanoate	Carbohydrate	Glycolysis / Gluconeogenesis	Carbohydrates and carbohydrate conjugates	Sugar acids and derivatives	166.974	75.2119	185.993	3.10335	C3H7O7P	[M-H2O-H]-	4.81889e-10	BioDeepDB	C00197	HMDB0060180	439183	3443-57-0
M218T149	Pantothenic acid	Cofactors and Vitamins	Pantothenate and CoA biosynthesis	Alcohols and polyols	Polyols	218.103	149.32	219.111	3.39723	C9H17NO5	[M-H]-	3.70989e-11	BioDeepDB	C00864	HMDB0000210	6613	79-83-4/20938-62-9/137-08-6
M185T72	2-Phospho-D-glyceric acid	Carbohydrate	Glycolysis / Gluconeogenesis	Organooxygen compounds	Carbohydrates and carbohydrate conjugates	184.985	72.1794	185.993	5.12456	C3H7O7P	[M-H]-	1.02123e-09	BioDeepDB	C00631	HMDB0003391	439278	3443-58-1
M181T314	3,4-Dihydroxyhydrocinnamic acid	Amino acid	Tyrosine metabolism	Phenylpropanoic acids	NULL	181.05	313.776	182.058	1.36843	C9H10O4	[M-H]-	0.00647823	BioDeepDB	C10447	HMDB0000423	348154	1078-61-1
M191T117	Isocitric acid	Carbohydrate	Citrate cycle (TCA cycle)	Carboxylic acids and derivatives	Tricarboxylic acids and derivatives	191.018	116.819	192.027	7.57454	C6H8O7	[M-H]-	0.00762501	MoNA	C00311	HMDB0000193	1198	320-77-4
M171T77	Glycerol 3-phosphate	Lipid	GlycerophosphoLipid	Glycerophospholipids	Glycerophosphates	171.005	77.2633	172.014	5.98662	C3H9O6P	[M-H]-	2.17555e-05	MoNA	C00093	HMDB0000126	439162	57-03-4/17989-41-2
M137T146	Urocanic acid	Amino acid	Histidine metabolism	Azoles	Imidazoles	137.034	146.45	138.043	10.9464	C6H6N2O2	[M-H]-	0.0192917	MoNA	C00785	HMDB0000301	736715	104-98-3
M295T806_2	12,13-DHOME	Lipid	Linoleic acid metabolism	Fatty Acyls	Fatty acids and conjugates	295.228	805.924	314.246	2.19631	C18H34O4	[M-H2O-H]-	0.00616919	mzCloud	C14829	HMDB0004705	10236635	NULL
M241T81	Glucose 6-phosphate	Carbohydrate	Starch and sucrose metabolism	Organooxygen compounds	Carbohydrates and carbohydrate conjugates	241.011	80.858	260.03	0.159057	C6H13O9P	[M-H2O-H]-	5.81356e-08	mzCloud	C00092	HMDB0001401	5958	56-73-5
M463T466	Quercetin 3-O-glucoside	Lipid	Flavone and flavonol biosynthesis	Flavonoids	Flavonoid glycosides	463.087	466.187	464.096	2.18972	C21H20O12	[M-H]-	1.06475e-12	mzCloud	C05623	HMDB0037362	5280804	c(21637-25-2, 482-35-9)
